# Supplementary material for: Fast preparation of RG-I enriched ultra-low molecular weight pectin by an ultrasound accelerated Fenton process
Source: PubMed Central journal article supplement (PMC5428719; doi:10.1038/s41598-017-00572-3), 2017-04-03
Supplement: 41598_2017_572_MOESM1_ESM.pdf [file 41598_2017_572_MOESM1_ESM.pdf]

# **Fast preparation of RG-I enriched ultra-low molecular weight pectin by an ultrasound accelerated Fenton process**

Zijian Zhi, Jianle Chen, Shan Li, Wenjun Wang, Rui Huang, Donghong Liu, Tian Ding, Xingqian Ye & Shiguo Chen\*

Zhejiang University, College of Biosystems Engineering and Food Science, Fuli Institute of Food Science, Zhejiang Key Laboratory for Agro-Food Processing, Zhejiang R & D Center for Food Technology and Equipment, Hangzhou 310058, China.

The corresponding authors:

Tel. / Fax: 86-571-88982151 (Shiguo Chen); 86-571-88982155 (Xingqian Ye)

E-mail: chenshiguo210@163.com (Shiguo Chen); psu@zju.edu.cn (Xingqian Ye)

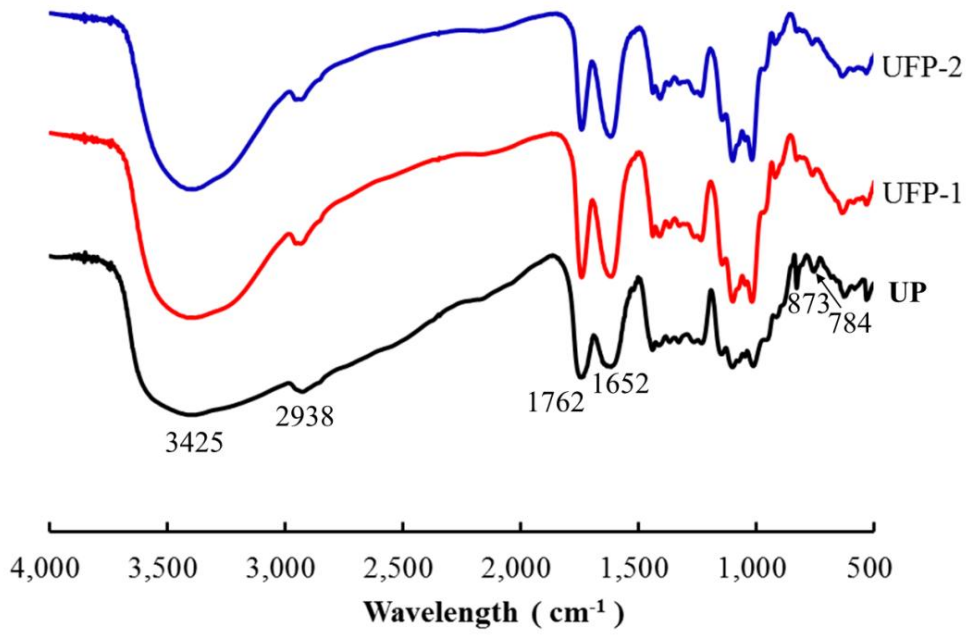

Fig.S1 FT -IR spectra of pectin polysaccharides.

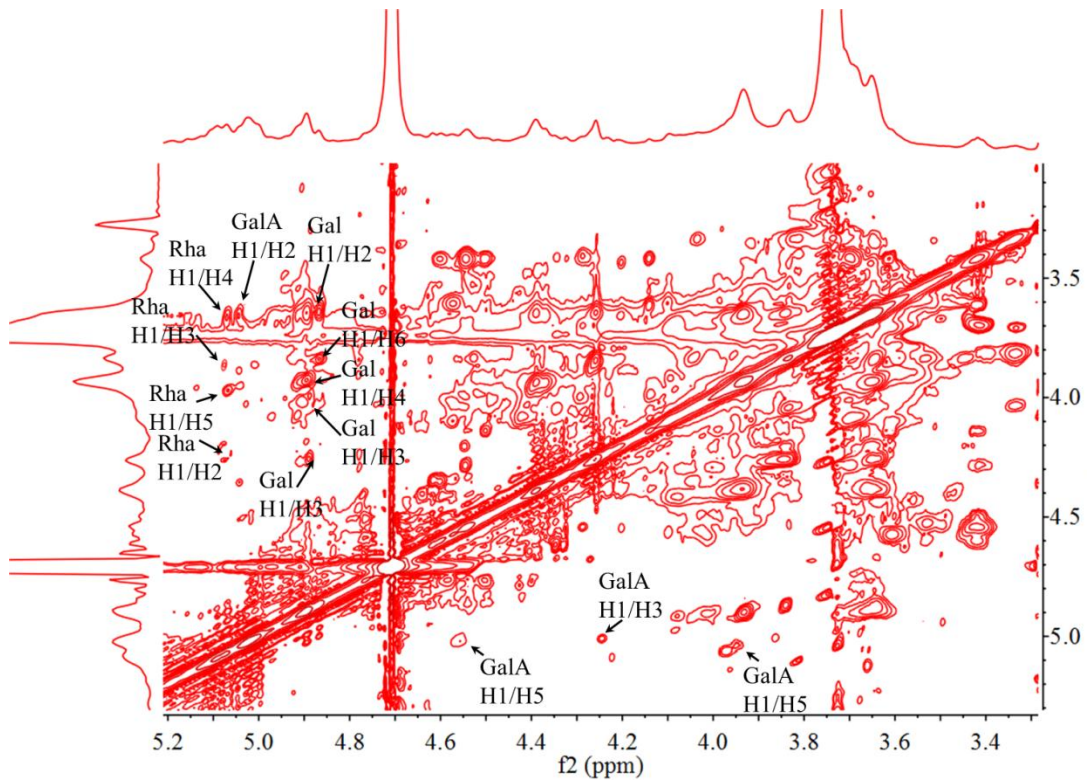

Fig.S2 TOCSY spectra of pectin polysaccharides.
